# Supplementary material for: Marine sponge-derived natural products: trends and opportunities for the decade of 2011-2020
Source: Frontiers journal article supplement (doi:10.3389/fmars.2024.1462825), 2024-08-26
Supplement: Data_Sheet_1.zip [file Supplementary Table S1.xls]

## Sheet: Sheet1
Supplementary Table S1: Total number of new compounds isolated from sponges from different geographical locations during the decade of 2011 to 2020
		Location of Collection
	Year	Antarctica	Argentina	Australia	Bahamas	Brazil	Canada	China	Cuba	Colombia	Dominica	Ecuador	Egypt	Eritrea	Fiji	France	Iceland	Indonesia	Iran	India	Ireland	Israel	Italy	Jamaica	Japan	Jordan	Korea	Malaysia	Maldives	Mauritus	Micronesia	Madagascar	Mexico	Mozambique	Mynmar	New Zealand	Niue	Norway	Palau	Papua New Guinea	Phillipines	Portugal	Puerto Rico	Red Sea	Russia	Taiwan	Thailand	United States	Unknown
	2011	0	0	44	8	0	0	79	1	0	0	0	3	0	5	14	0	6	0	0	0	0	0	2	38	0	9	0	0	0	15	1	7	0	0	7	0	1	0	8	0	0	0	0	0	3	5	2	6
	2012	0	0	63	4	0	0	61	0	0	2	0	5	0	16	14	0	45	0	0	0	0	9	0	28	0	19	3	0	2	16	0	3	0	0	0	0	6	0	0	5	0	0	0	0	5	9	7	8
	2013	1	3	14	6	2	4	23	0	3	0	0	5	0	7	5	0	15	0	0	0	0	0	0	44	0	34	4	0	0	8	6	0	0	0	13	0	0	9	2	0	0	3	0	2	0	3	5	0
	2014	1	0	30	6	0	0	83	0	0	0	0	4	0	0	0	0	25	0	3	2	0	1	0	36	0	21	0	0	0	8	9	0	0	0	9	0	0	0	0	4	0	0	1	2	4	13	0	8
	2015	0	0	7	16	9	0	41	0	0	0	0	10	0	2	0	0	28	0	0	2	0	0	3	44	2	16	1	0	0	8	5	0	0	0	9	0	0	0	0	0	0	0	0	30	13	1	11	0
	2016	1	0	9	11	0	8	46	0	0	0	0	5	1	0	7	3	41	0	0	0	0	2	0	29	0	7	0	0	2	3	0	0	0	0	0	0	2	0	0	0	4	0	0	2	3	10	4	0
	2017	4	0	3	0	4	0	54	7	0	0	0	0	0	0	18	1	59	0	0	3	0	0	0	10	0	6	0	0	0	2	10	0	0	0	0	0	0	3	0	2	0	4	0	13	0	8	3	2
	2018	3	0	29	1	13	0	40	0	0	0	4	11	0	0	0	3	9	0	1	0	0	0	0	17	0	1	4	0	0	6	0	0	0	2	8	0	0	0	0	4	0	0	0	0	0	13	0	24
	2019	4	0	13	7	6	0	59	0	0	0	0	7	0	0	4	0	15	0	0	6	0	0	0	11	0	3	1	1	0	0	0	2	1	0	8	8	0	0	0	1	0	0	0	9	0	0	7	0
	2020	12	0	25	4	0	0	75	0	0	0	0	10	0	3	10	0	4	1	0	0	8	0	0	9	0	0	0	7	0	15	0	0	0	0	1	0	0	6	2	9	0	0	3	26	10	8	4	0
[truncated: 12 more columns]
